# Supplementary material for: Tailoring energy level and surface basicity of metal oxide semiconductors by rare-earth incorporation for high-performance formaldehyde detection
Source: Royal Society of Chemistry journal article supplement (doi:10.1039/c9qi00381a), 2019-01-01
Supplement: c9qi00381a1.pdf [file c9qi00381a1.pdf]

## Supporting Information

### **Tailoring Energy Level and Surface Basicity of Metal Oxide Semiconductor by Rare-Earth Incorporation for High Performance Formaldehyde Detection**

Yanfang Zhao,<sup>a</sup> Xiaoxin Zou,<sup>a</sup> Hui Chen,<sup>a</sup> Xuefeng Chu,<sup>b</sup> Guo-Dong Li<sup>\*,a</sup>

<sup>a</sup> State Key Laboratory of Inorganic Synthesis and Preparative Chemistry, College of Chemistry, Jilin University, Changchun 130012, P. R. China

<sup>b</sup> Key Laboratory of Architectural Cold Climate Energy Management, Ministry of Education, Jilin Jianzhu University, Changchun 130118, China

\* Corresponding author. E-mail address: lgd@jlu.edu.cn

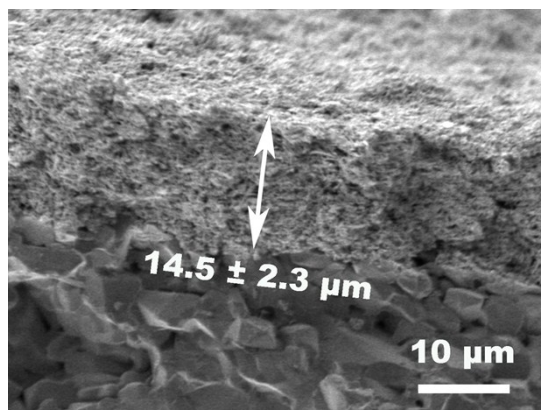

**Figure S1** The thickness of the sensing film was measured by SEM.

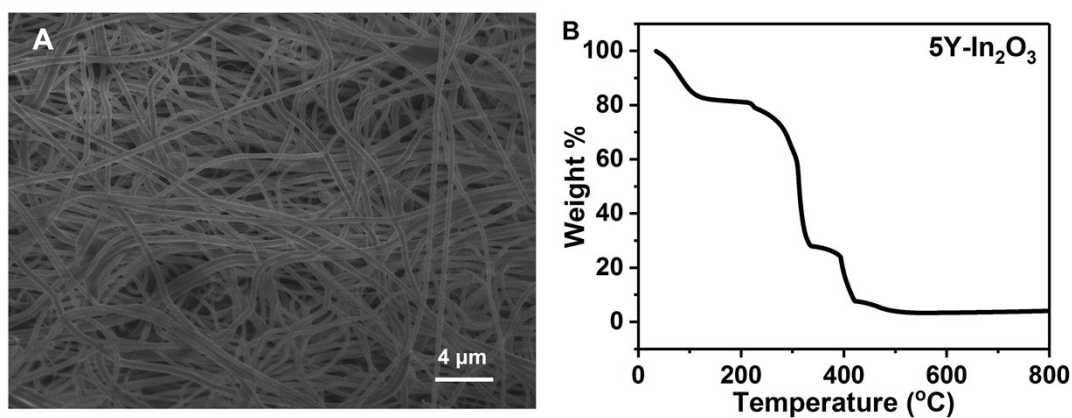

**Figure S2** (A) SEM image and (B) Thermogravimetric (TG) curve of as prepared nanofiber precursor containing Y, In and PVP.

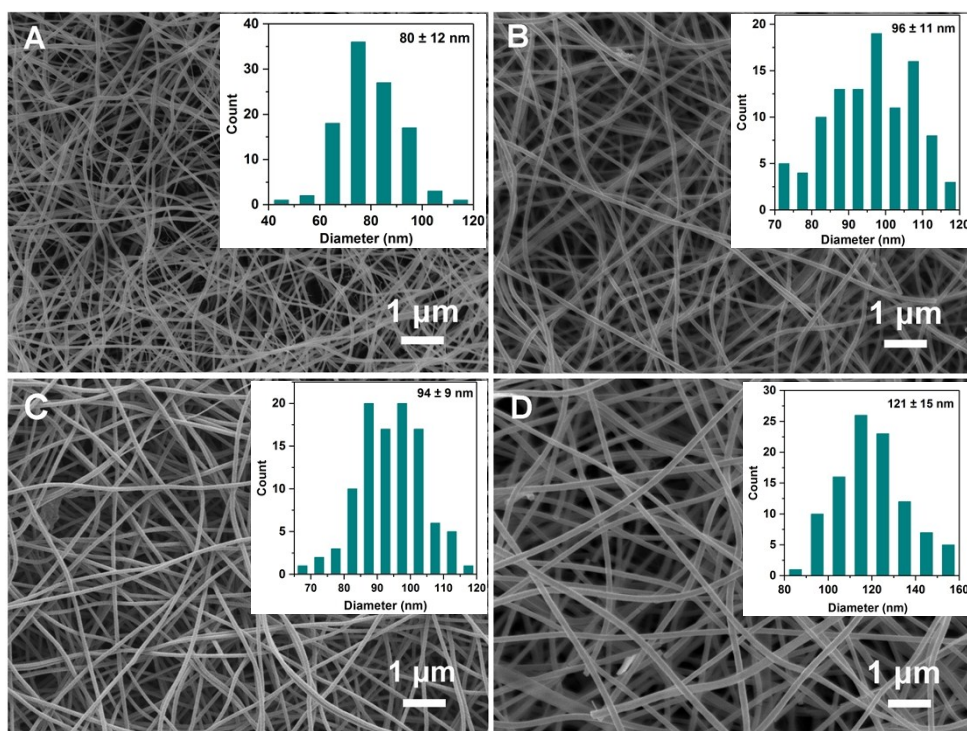

**Figure S3** SEM images and corresponding nanofibers size-distribution diagrams of (A)  $\text{In}_2\text{O}_3$ , (B)  $1\text{Y-In}_2\text{O}_3$ , (C)  $3\text{Y-In}_2\text{O}_3$  and (D)  $7\text{Y-In}_2\text{O}_3$ .

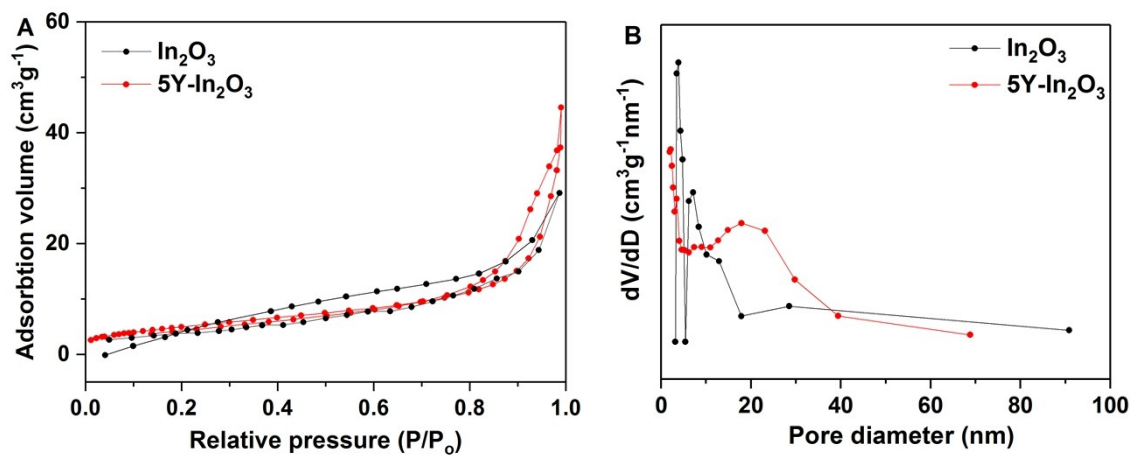

**Figure S4** (A)  $\text{N}_2$  adsorption-desorption isotherms and (B) pore size distribution curves of  $\text{In}_2\text{O}_3$  and  $5\text{Y-In}_2\text{O}_3$ .

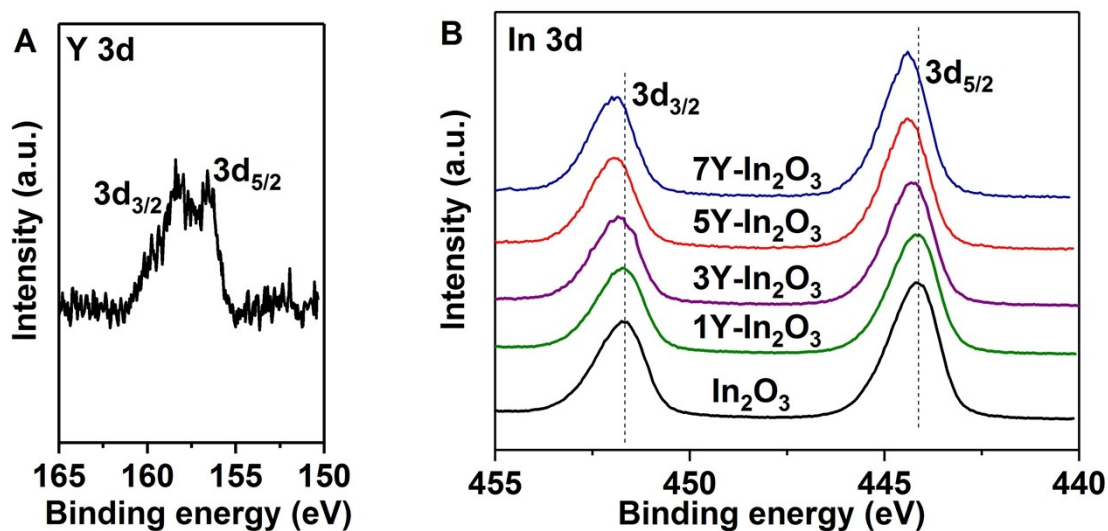

Figure S5 XPS of (A) Y 3d for 5Y-In<sub>2</sub>O<sub>3</sub> and (B) In 3d for x Y-In<sub>2</sub>O<sub>3</sub>.

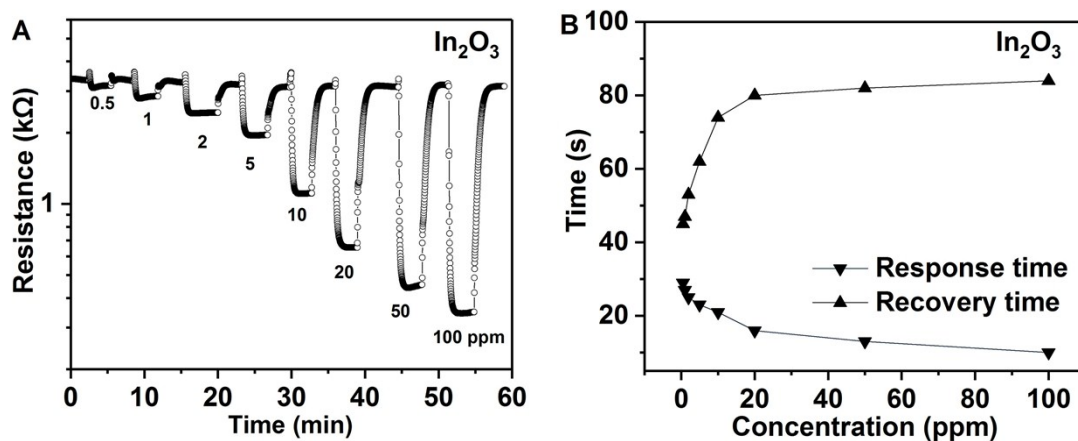

Figure S6 (A) The dynamic resistance of the In<sub>2</sub>O<sub>3</sub> sensor toward various concentration of formaldehyde at 120 °C, (B) Response time and recover time of 5Y-In<sub>2</sub>O<sub>3</sub> toward formaldehyde at 120 °C.

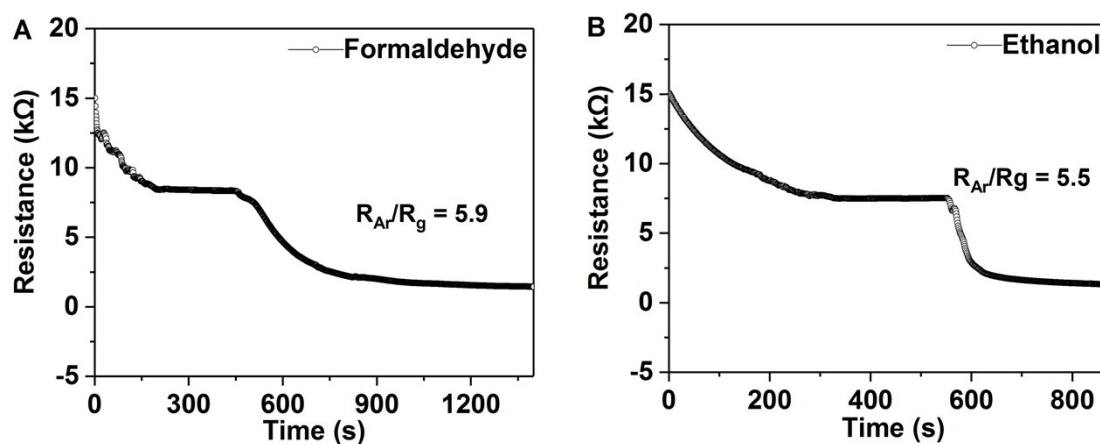

**Figure S7** In argon atmosphere, the responses of 5Y-In<sub>2</sub>O<sub>3</sub> sensor to 100 ppm (A) formaldehyde and (B) ethanol at 120 °C.

**Table S1** Comparison of 5Y-In<sub>2</sub>O<sub>3</sub> and In<sub>2</sub>O<sub>3</sub>-based sensing materials reported in literature for formaldehyde sensing performance.

| Sensing material                                     | Formaldehyde concentration | Response time (s) | Recovery time (s) | Operating Temperature | Response    | Reference        |
|------------------------------------------------------|----------------------------|-------------------|-------------------|-----------------------|-------------|------------------|
| <b>5Y-In<sub>2</sub>O<sub>3</sub></b>                | <b>100 ppm</b>             | <b>1</b>          | <b>105</b>        | <b>120 °C</b>         | <b>91.7</b> | <b>This work</b> |
| In <sub>2</sub> O <sub>3</sub> /1% Co                | 10 ppm                     | 60                | 120               | 130 °C                | 23.2        | 1                |
| Al <sub>0.15</sub> In <sub>1.85</sub> O <sub>3</sub> | 100 ppm                    | 2                 | 103               | 150 °C                | 60.3        | 2                |
| Ga <sub>0.6</sub> In <sub>1.4</sub> O <sub>3</sub>   | 100 ppm                    | 1                 | 70                | 150 °C                | 52.4        | 3                |
| Au-loaded In <sub>2</sub> O <sub>3</sub>             | 100 ppm                    | 3                 | 8                 | 240 °C                | 37          | 4                |
| 1 at% Pt-In <sub>2</sub> O <sub>3</sub>              | 10 ppm                     | 2                 | 51                | 120 °C                | 26          | 5                |
| Ag-loaded In <sub>2</sub> O <sub>3</sub>             | 20 ppm                     | 0.9               | 14                | 240 °C                | 113         | 6                |
| In <sub>2</sub> O <sub>3</sub> -H10                  | 100 ppm                    | 100               | 70                | 230 °C                | 80          | 7                |

**Table S2** BET specific surface area ( $S_{\text{BET}}$ ), pore volume and average pore size distribution of 5Y-In<sub>2</sub>O<sub>3</sub> and In<sub>2</sub>O<sub>3</sub> were determined by N<sub>2</sub> adsorption-desorption measurement.

| Sample                            | $S_{\text{BET}}$ (m <sup>2</sup> /g) | Average pore size (nm) | pore volume (cm <sup>3</sup> /g) |
|-----------------------------------|--------------------------------------|------------------------|----------------------------------|
| In <sub>2</sub> O <sub>3</sub>    | 18                                   | 13                     | 0.041                            |
| 5Y-In <sub>2</sub> O <sub>3</sub> | 19                                   | 14                     | 0.044                            |

**Table S3** The binding energy and relative percentage of oxygen species in In<sub>2</sub>O<sub>3</sub> and 5Y-In<sub>2</sub>O<sub>3</sub> according to their fitted O 1s XPS Spectra.

| Sample                            | Oxygen species     | Binding energy (eV) | Relative percentage (%) |
|-----------------------------------|--------------------|---------------------|-------------------------|
| In <sub>2</sub> O <sub>3</sub>    | Chemisorbed oxygen | 531.9               | 22                      |
|                                   | Oxygen vacancy     | 530.5               | 24                      |
|                                   | Lattice oxygen     | 529.8               | 54                      |
| 5Y-In <sub>2</sub> O <sub>3</sub> | Chemisorbed oxygen | 532.2               | 34                      |
|                                   | Oxygen vacancy     | 530.8               | 36                      |
|                                   | Lattice oxygen     | 530.1               | 30                      |

**Table S4** Work functions and Fermi levels of RE-In<sub>2</sub>O<sub>3</sub> and In<sub>2</sub>O<sub>3</sub>, and the responses of RE-In<sub>2</sub>O<sub>3</sub> and In<sub>2</sub>O<sub>3</sub> sensor to 100 ppm formaldehyde at 120 °C.

| Sample                             | Work function (eV) | Fermi level (eV) | Responses (R <sub>a</sub> /R <sub>g</sub> ) |
|------------------------------------|--------------------|------------------|---------------------------------------------|
| In <sub>2</sub> O <sub>3</sub>     | 5.08               | -5.08            | 12.6                                        |
| 5Y-In <sub>2</sub> O <sub>3</sub>  | 4.94               | -4.94            | 91.7                                        |
| 5La-In <sub>2</sub> O <sub>3</sub> | 4.95               | -4.95            | 52.4                                        |
| 5Nd-In <sub>2</sub> O <sub>3</sub> | 4.97               | -4.97            | 49.1                                        |
| 5Ho-In <sub>2</sub> O <sub>3</sub> | 4.94               | -4.94            | 41.4                                        |
| 5Tm-In <sub>2</sub> O <sub>3</sub> | 4.93               | -4.93            | 40.5                                        |

## References

- 1 Z.H. Wang, C. L. Hou, Q. M. De, F. B. Gu, D. M. Han, One-Step Synthesis of Co-Doped In<sub>2</sub>O<sub>3</sub> Nanorods for High Response of Formaldehyde Sensor at Low Temperature, *Acs Sensors*, 2018, **3**, 468-475.
- 2 H. Chen, Y. Zhao, L. Shi, G. D. Li, L. Sun and X.X. Zou, Revealing the Relationship between Energy Level and Gas Sensing Performance in Heteroatom-Doped Semiconducting Nanostructures, *ACS Appl. Mater. Interfaces*, 2018, **10**, 29795-29804.
- 3 H. Chen, J. Hu, G. D. Li, Q. Gao, C. Wei and X. X. Zou, Porous Ga-In Bimetallic Oxide Nanofibers with Controllable Structures for Ultrasensitive and Selective Detection of Formaldehyde, *ACS Appl. Mater. Interfaces*, 2017, **9**, 4692-4700.
- 4 S. Zhang, P. Song, J. Li, J. Zhang, Z. X. Yang, Q. Wang, Facile approach to prepare hierarchical Au-loaded In<sub>2</sub>O<sub>3</sub> porous nanocubes and their enhanced sensing performance towards formaldehyde, *Sens. Actuators, B*, 2017, **241**, 1130-1138.

- 5 R. J. Ma, X. Zhao, X. X. Zou, G. D. Li, Enhanced formaldehyde sensing performance at ppb level with Pt-doped nanosheet-assembled In<sub>2</sub>O<sub>3</sub> hollow microspheres, *J. Alloy. Compd.* 2018, **732**, 863-870.
- 6 S. M. Wang, B. X. Xiao, T. Y. Yang, P. Wang, C. H. Xiao, Z. F. Li, R. Zhao, M. Z. Zhang, Enhanced HCHO gas sensing properties by Ag-loaded sunflower-like In<sub>2</sub>O<sub>3</sub> hierarchical nanostructures, *J. Mater. Chem. A*, 2014, **2**, 6598-6604.
- 7 F. B. Gu, C. J. Li, D. M. Han, Z. H. Wang, Manipulating the Defect Structure (V-O) of In<sub>2</sub>O<sub>3</sub> Nanoparticles for Enhancement of Formaldehyde Detection, *ACS Appl. Mater. Interfaces*, 2018, **10**, 933-942.
